# Supplementary material for: Architecture and Gene Repertoire of the Flexible Genome of the Extreme Acidophile Acidithiobacillus caldus
Source: PLoS One. 2013 Nov 8;8(11):e78237. doi: 10.1371/journal.pone.0078237 (PMC3826726; doi:10.1371/journal.pone.0078237)
Supplement: Table S4 — Predicted IS families and features associated to IS-rich regions in the genome of A. caldus ATCC 51756 and A. caldus SM-1. (XLSX) [file pone.0078237.s004.xlsx]

## Sheet: 4A 
	Table S4A - IS family prediction using TnpPred in A. caldus ATCC51756 and A.caldus SM-1
		1	Strain	Replicon	MGE	Locus_tag	IS Family	Start Pos.	Abs. Frame	Length(aa)	Completeness(%)	Gaps(aa)	Stops	E-value
		2	ATCC 51756	Chromosome	AcaML1	AcaTY_0151	IS3_IS407_ORF2	147448	Plus1	344	100	64	3	2.3e-12
		4	ATCC 51756	Chromosome	AcaML1	AcaTY_0152	IS5_IS5	147994	Plus1	422	100	36	5	3.4e-47
		6	ATCC 51756	Chromosome	AcaML1	AcaTY_0153	IS21_ORF1	149008	Plus1	525	100	15	0	1.2e-207
		7	ATCC 51756	Chromosome	AcaML1	AcaTY_0154	IS21_ORF2	159590	Plus2	258	100	3	1	2.3e-123
		8	ATCC 51756	Chromosome	AcaML1	AcaTY_0155	IS5_IS5	151568	Plus2	141	33.41	0	0	1.2e-30
		9	ATCC 51756	Chromosome		AcaTY_0159	IS256	156665	Plus2	402	100	23	0	3.3e-118
		10	ATCC 51756	Chromosome	ICEAcaTY.1	AcaTY_0175	IS21_ORF1	170657	Minus1	525	100	55	3	7.6e-07
		13	ATCC 51756	Chromosome	ICEAcaTY.1		IS30	174697	Plus1	58	16.43	0	2	3.8e-13
		15	ATCC 51756	Chromosome	ICEAcaTY.1	AcaTY_0179	IS1182	175038	Plus3	459	100	126	1	5.1e-86
		16	ATCC 51756	Chromosome	ICEAcaTY.1		IS30	176213	Plus2	13	3.68	0	0	9.2e-07
		17	ATCC 51756	Chromosome	ICEAcaTY.1	AcaTY_0180	IS1182	177052	Minus2	459	100	126	1	1.3e-85
		20	ATCC 51756	Chromosome	ICEAcaTY.1	AcaTY_0183	ISL3	181190	Plus2	451	100	51	1	3.1e-121
		21	ATCC 51756	Chromosome	ICEAcaTY.1		IS5_IS5	195777	Plus3	422	100	88	1	1.1e-87
		22	ATCC 51756	Chromosome	ICEAcaTY.1		IS3_IS150_combined	197426	Plus2	66	13.1	1	0	6.4e-10
		23	ATCC 51756	Chromosome	ICEAcaTY.1		ISL3	197851	Plus1	35	7.76	0	1	2e-09
		24	ATCC 51756	Chromosome	ICEAcaTY.1	AcaTY_0205	IS5_IS5	199425	Minus3	422	100	125	1	2e-101
		26	ATCC 51756	Chromosome	ICEAcaTY.1	AcaTY_0206	IS110	201588	Minus3	416	100	46	0	4.9e-65
		27	ATCC 51756	Chromosome	ICEAcaTY.1	AcaTY_0207	IS110	203298	Minus3	416	100	81	3	7.3e-20
		28	ATCC 51756	Chromosome	ICEAcaTY.1	AcaTY_0216	IS1595	212655	Minus3	337	100	51	1	2.3e-117
		30	ATCC 51756	Chromosome	ICEAcaTY.1	AcaTY_0229	IS66_ORF3	224103	Minus3	558	100	52	1	8.5e-32
		33	ATCC 51756	Chromosome	ICEAcaTY.1	AcaTY_0230	IS66_combined	225674	Minus1	107	12.62	1	0	6.9e-32
		34	ATCC 51756	Chromosome	ICEAcaTY.1	AcaTY_0241	IS3_IS3_ORF2	234270	Plus3	39	13.54	0	0	5.5e-15
		37	ATCC 51756	Chromosome	GIAcaTY.1	AcaTY_0455	IS1182	456991	Plus1	459	100	126	1	1.3e-85
		40	ATCC 51756	Chromosome	GIAcaTY.1	AcaTY_0467	IS3_IS51_ORF1	467585	Plus2	108	100	2	0	6.2e-50
		46	ATCC 51756	Chromosome	GIAcaTY.1	AcaTY_0468	IS3_IS51_combined	467746	Plus3	317	100	15	2	1e-54
		46	ATCC 51756	Chromosome	GIAcaTY.1	AcaTY_0469	IS3_IS51_ORF2	467746	Plus1	317	100	15	2	2.6e-06
		50	ATCC 51756	Chromosome	ISR2	AcaTY_0531	IS1595	538684	Minus2	337	100	58	0	9.8e-117
		52	ATCC 51756	Chromosome	ISR3	AcaTY_0554	IS1182	565424	Plus2	459	100	126	1	8.9e-85
		53	ATCC 51756	Chromosome	ISR3	AcaTY_0557	IS5_IS5	569712	Plus3	64	15.17	2	0	7.5e-22
		57	ATCC 51756	Chromosome	ISR3	AcaTY_0561	IS66_ORF3	571480	Minus2	558	100	51	1	6.8e-33
		62	ATCC 51756	Chromosome	ISR3	AcaTY_0562	IS66_combined	573051	Minus3	107	12.62	1	0	1.8e-32
		63	ATCC 51756	Chromosome	ISR3	AcaTY_0564	IS66_ORF3	573765	Plus3	558	100	62	2	1.1e-08
		64	ATCC 51756	Chromosome	ISR3	AcaTY_0567	IS256	577100	Plus2	402	100	23	0	3.3e-118
		65	ATCC 51756	Chromosome	ISR4	AcaTY_0643	IS5_IS5	642210	Plus2	422	100	85	1	5.4e-12
		66	ATCC 51756	Chromosome	ISR4	AcaTY_0646	IS256	645931	Plus3	402	100	23	0	3.3e-118
		67	ATCC 51756	Chromosome	ISR4	AcaTY_0652	ISL3	658428	Plus2	451	100	78	0	7.4e-92
		70	ATCC 51756	Chromosome	ISR4	AcaTY_0655	IS66_ORF3	659578	Minus3	558	100	52	1	8.3e-34
		73	ATCC 51756	Chromosome	ISR4	AcaTY_0656	IS66_combined	661149	Minus1	107	12.62	1	0	1.8e-32
		74	ATCC 51756	Chromosome	ISR4	AcaTY_0658	ISL3	661892	Plus1	42	9.31	0	1	3.3e-12
		80	ATCC 51756	Chromosome		AcaTY_0868	IS1182	881192	Minus1	459	100	126	1	1.3e-85
		77	ATCC 51756	Chromosome		AcaTY_0948	IS481	955094	Plus2	341	100	46	0	1.4e-11
		86	ATCC 51756	Chromosome		AcaTY_0991	IS256	992445	Minus1	402	100	23	0	3.3e-118
		78	ATCC 51756	Chromosome			IS5_IS5	871275	Plus3	50	11.85	2	0	9.7e-15
		79	ATCC 51756	Chromosome			IS5_IS5	871599	Plus3	27	6.4	0	2	5.7e-06
		80	ATCC 51756	Chromosome			IS1182	879395	Minus1	459	100	126	1	1.3e-85
		84	ATCC 51756	Chromosome			IS481	953378	Minus1	341	100	46	0	6.4e-12
		87	ATCC 51756	Chromosome	GIAcaTY.3	AcaTY_1009/10	IS110	1011042	Minus1	416	100	97	2	5.6e-83
		95	ATCC 51756	Chromosome	GIAcaTY.3	AcaTY_1011	IS3_IS3_ORF1	1012155	Minus1	286	100	33	0	5.9e-19
		103	ATCC 51756	Chromosome	GIAcaTY.3	AcaTY_1012	IS3_IS3_ORF2	1013069	Minus1	240	83.33	17	0	1.6e-29
		115	ATCC 51756	Chromosome	GIAcaTY.3	Aca_1018	IS256	1021944	Plus2	402	100	23	0	3.3e-118
		116	ATCC 51756	Chromosome	GIAcaTY.3	AcaTY_1020	IS5_IS5	1023892	Plus3	422	100	103	1	5.3e-127
		125	ATCC 51756	Chromosome	GIAcaTY.3	AcaTY_1035	IS1182	1041656	Minus2	133	28.98	10	0	1.4e-35
		130	ATCC 51756	Chromosome		AcaTY_1091	IS1595	1112131	Plus2	337	100	50	1	1e-117
		131	ATCC 51756	Chromosome		AcaTY_1110	IS256	1132058	Plus3	402	100	23	0	3.3e-118
		132	ATCC 51756	Chromosome			IS5_IS5	1183469	Minus1	422	100	103	1	5.3e-127
		133	ATCC 51756	Chromosome		AcaTY_1169	IS256	1195490	Minus2	402	100	23	0	3.3e-118
		134	ATCC 51756	Chromosome			IS5_IS5		Plus2	422	100	103	1	1e-127
		135	ATCC 51756	Chromosome		AcaTY_1298	IS256	1337561	Minus2	402	100	23	0	3.3e-118
		136	ATCC 51756	Chromosome		AcaTY_1304	IS5_IS5	1346077	Plus3	422	100	86	1	1.4e-11
		137	ATCC 51756	Chromosome		AcaTY_1305	IS5_IS5	1347295	Plus3	422	100	101	1	9.3e-120
		138	ATCC 51756	Chromosome		AcaTY_1306	IS5_IS5	1348404	Plus2	422	100	103	1	1.8e-129
		140	ATCC 51756	Chromosome		AcaTY_1307/8	IS21_ORF1	1348342	Plus1	525	100	45	4	2.9e-67
		141	ATCC 51756	Chromosome		AcaTY_1309	IS21_ORF2	1351170	Plus2	258	100	7	1	1.1e-96
		143	ATCC 51756	Chromosome			IS3_IS51_ORF1	1350910	Plus1	108	100	32	2	2.3e-12
		145	ATCC 51756	Chromosome		AcaTY_1318	IS5_IS5	1362216	Plus2	422	100	87	1	1.7e-89
		146	ATCC 51756	Chromosome		AcaTY_1319	ISL3	1363621	Minus3	451	100	51	1	5.2e-121
		148	ATCC 51756	Chromosome		AcaTY_1323	IS256	1372361	Plus1	81	20.15	1	0	2.2e-28
		149	ATCC 51756	Chromosome		AcaTY_1328	IS630	1377569	Minus2	365	100	24	0	9e-65
		150	ATCC 51756	Chromosome		AcaTY_1332	IS256	1382155	Plus3	402	100	23	0	3.3e-118
		155	ATCC 51756	Chromosome		AcaTY_1348	IS3_IS3_ORF2	1396378	Minus3	288	100	34	4	1.7e-22
		169	ATCC 51756	Chromosome		AcaTY_1353	IS5_IS5	1401169	Minus3	422	100	102	1	2.8e-118
		174	ATCC 51756	Chromosome		AcaTY_1386	IS630	1443882	Minus1	365	100	24	0	9e-65
		175	ATCC 51756	Chromosome	GIAcaTY.4		IS5_IS5	1582429	Minus2	422	100	103	1	1e-127
		176	ATCC 51756	Chromosome	GIAcaTY.4	AcaTY_1516	IS5_IS5	1587463	Plus3	111	26.3	2	0	7.8e-32
		177	ATCC 51756	Chromosome	GIAcaTY.4	AcaTY_1517	IS5_IS5	1587974	Plus1	86	20.38	1	1	2.1e-17
		178	ATCC 51756	Chromosome	GIAcaTY.4	AcaTY_1518	IS1595	1588386	Plus2	143	42.43	20	1	1.9e-32
		179	ATCC 51756	Chromosome	GIAcaTY.4	AcaTY_1536	IS5_IS5	1608365	Minus2	422	100	85	1	2e-87
		181	ATCC 51756	Chromosome	GIAcaTY.4	AcaTY_1537	IS1595	1608384	Minus3	181	53.71	29	0	3.5e-77
		182	ATCC 51756	Chromosome	GIAcaTY.4	AcaTY_1538	IS256	1610763	Plus2	402	100	23	0	3.3e-118
		183	ATCC 51756	Chromosome	GIAcaTY.4	AcaTY_1539	IS30	1612257	Plus2	353	100	86	5	1.6e-15
		184	ATCC 51756	Chromosome	GIAcaTY.4	AcaTY_1540	IS66_combined	1612718	Minus2	81	9.55	1	0	3.9e-25
		185	ATCC 51756	Chromosome	GIAcaTY.4	AcaTY_1541	IS30	1613425	Plus2	90	25.5	2	2	6.6e-27
		187	ATCC 51756	Chromosome	GIAcaTY.4	AcaTY_1573	IS1595	1646169	Minus1	337	100	58	0	9.8e-117
		189	ATCC 51756	Chromosome	GIAcaTY.4	AcaTY_1579	IS66_ORF3	1650172	Minus3	558	100	52	1	1.5e-32
		201	ATCC 51756	Chromosome	GIAcaTY.4	AcaTY_1591	IS1595	1662303	Minus1	337	100	58	0	9.8e-117
		202	ATCC 51756	Chromosome	GIAcaTY.4		IS30	1683320	Plus2	52	14.73	3	0	1.2e-17
		203	ATCC 51756	Chromosome	GIAcaTY.4		IS30	1683459	Plus3	53	15.01	1	0	2.8e-24
		204	ATCC 51756	Chromosome		AcaTY_1647	IS630	1709555	Minus2	365	100	24	0	9e-65
		205	ATCC 51756	Chromosome			IS1182	1710097	Minus2	87	18.95	37	0	1.4e-15
		206	ATCC 51756	Chromosome		AcaTY_1650	IS1595	1712303	Minus2	337	100	58	0	9.8e-117
		207	ATCC 51756	Chromosome		AcaTY_1654	IS1595	1715867	Minus2	337	100	58	0	1.5e-117
		208	ATCC 51756	Chromosome		AcaTY_1671	IS256	1734500	Minus2	402	100	23	0	3.3e-118
		209	ATCC 51756	Chromosome			IS5_IS5	1767707	Minus1	422	100	102	1	1.8e-117
		213	ATCC 51756	Chromosome		AcaTY_1715	IS256	1770891	Minus1	380	94.53	17	1	8.7e-114
		214	ATCC 51756	Chromosome		AcaTY_1717	IS110	1772513	Minus2	416	100	80	2	2.9e-91
		215	ATCC 51756	Chromosome			IS5_IS5	1796816	Minus1	176	41.71	67	0	4.4e-10
		216	ATCC 51756	Chromosome			IS5_IS5	1796934	Minus3	422	100	165	3	2.4e-12
		220	ATCC 51756	Chromosome		AcaTY_1741	IS3_IS3_ORF2	1801124	Plus2	288	100	13	5	9.4e-14
		223	ATCC 51756	Chromosome	ICEAcaTY.3		IS256	1815082	Plus1	194	48.26	18	0	1.7e-32
		224	ATCC 51756	Chromosome	ICEAcaTY.3	AcaTY_1759	IS256	1816664	Plus1	183	45.52	14	0	2.2e-45
		225	ATCC 51756	Chromosome	ICEAcaTY.3	AcaTY_1778	IS256	1835698	Plus1	402	100	23	0	3.3e-118
		228	ATCC 51756	Chromosome	ICEAcaTY.3	AcaTY_1811	IS1595	1870350	Minus1	337	100	58	0	1.5e-117
		229	ATCC 51756	Chromosome	ICEAcaTY.3	AcaTY_1832	IS1380	1892798	Minus1	487	100	51	1	7.4e-09
		230	ATCC 51756	Chromosome	ICEAcaTY.3	AcaTY_1898	IS256	1965579	Minus3	402	100	23	0	3.1e-116
		231	ATCC 51756	Chromosome			IS3_IS3_combined	2009908	Plus1	80	18.87	9	0	5.7e-06
		232	ATCC 51756	Chromosome		AcaTY_1947	IS481	2011252	Plus2	67	19.65	1	0	3.7e-11
		233	ATCC 51756	Chromosome		AcaTY_1999	IS5_IS5	2070809	Minus2	422	100	103	1	7e-130
		233	ATCC 51756	Chromosome		AcaTY_2000	IS5_IS5	2071963	Minus2	422	100	85	1	5.2e-12
		236	ATCC 51756	Chromosome	ISR6		IS1182	2071540	Minus2	109	23.75	8	0	1.8e-37
		238	ATCC 51756	Chromosome	ISR6	AcaTY_2003	IS256	2076398	Plus2	402	100	23	0	3.3e-118
		242	ATCC 51756	Chromosome	ISR6	AcaTY_2007	IS21_ORF2	2080168	Plus1	258	100	7	1	2.6e-99
		244	ATCC 51756	Chromosome	ISR6	AcaTY_2012	IS5_IS5	2086798	Minus2	422	100	103	2	2.7e-126
		249	ATCC 51756	Chromosome		AcaTY_2683	IS5_IS5	2772931	Minus1	422	100	103	1	7e-130
		251	ATCC 51756	Megaplasmid mpAcaTY.1		mpAcaTY_017	IS5_IS5	10943	Minus2	422	100	135	1	2.6e-101
		252	ATCC 51756	Megaplasmid mpAcaTY.1		mpAcaTY_019	IS1182	11956	Minus2	459	100	126	1	7.4e-85
		255	ATCC 51756	Megaplasmid mpAcaTY.1		mpAcaTY_024	ISL3	16502	Minus2	451	100	51	1	1.8e-120
		256	ATCC 51756	Megaplasmid mpAcaTY.1		mpAcaTY_031	IS256	26089	Minus3	124	30.85	3	0	3e-40
		257	ATCC 51756	Megaplasmid mpAcaTY.1		mpAcaTY_032	IS256	26454	Minus1	265	68.91	20	0	3e-69
		258	ATCC 51756	Megaplasmid mpAcaTY.1		mpAcaTY_036	IS256	30284	Minus2	387	100	23	0	3.3e-118
		260	ATCC 51756	Megaplasmid mpAcaTY.1		mpAcaTY_040	IS5_IS5	35460	Plus1	320	100	103	1	5.3e-127
		262	ATCC 51756	Megaplasmid mpAcaTY.1		mpAcaTY_051	IS5_IS5	43577	Minus2	280	86.02	85	0	4.7e-88
		264	ATCC 51756	Megaplasmid mpAcaTY.1		mpAcaTY_053	IS1182	44780	Minus2	72	16.34	5	0	3.1e-09
		265	ATCC 51756	Megaplasmid mpAcaTY.1		mpAcaTY_054	IS1182	45101	Minus2	162	34.86	9	0	5.2e-56
		266	ATCC 51756	Megaplasmid mpAcaTY.1		mpAcaTY_085	ISL3	65569	Plus2	401	47.67	17	0	1.8E-120
		268	ATCC 51756	Megaplasmid mpAcaTY.1		mpAcaTY_093	IS5_IS5	73255	Plus3	340	100	85	13	6.7e-87
		270	ATCC 51756	Megaplasmid mpAcaTY.1		mpAcaTY_094´	IS110	73662	Plus2	518	100	134	165	1.6e-07
		271	ATCC 51756	Megaplasmid mpAcaTY.1		mpAcaTY_098	IS481	77899	Minus3	309	100	41	1	6.7e-09
		272	ATCC 51756	Megaplasmid mpAcaTY.1		mpAcaTY_099	IS5_IS5	79954	Plus3	310	100	113	0	4.2e-81
		275	ATCC 51756	Megaplasmid mpAcaTY.1		mpAcaTY_100	IS5_IS5	80042	Minus2	351	100	85	1	2.8e-12
		276	ATCC 51756	Megaplasmid mpAcaTY.1		mpAcaTY_106	IS630	85668	Minus1	341	100	24	0	1.5e-61
		277	ATCC 51756	Megaplasmid mpAcaTY.1		mpAcaTY_107´	IS3_IS150_combined	86864	Minus2	99	19.64	0	1	2.4e-11
		278	ATCC 51756	Megaplasmid mpAcaTY.1		mpAcaTY_117	IS1595	95306	Minus2	418	100	132	29	1.4e-13
		279	ATCC 51756	Megaplasmid mpAcaTY.1		mpAcaTY_130/131/132	IS5_IS5	101999	Plus3	662	100	174	82	6.7e-13
		281	ATCC 51756	Megaplasmid mpAcaTY.1		mpAcaTY_155	IS630	124624	Plus1	365	100	49	82	1.1e-63
		283	ATCC 51756	Megaplasmid mpAcaTY.1		mpAcaTY_159	IS256	129503	Minus1	323	50.5	4	0	6.2e-111
		284	ATCC 51756	Megaplasmid mpAcaTY.1		mpAcaTY_172	IS1595	137038	Plus2	281	100	58	0	1.5e-117
		285	ATCC 51756	Megaplasmid mpAcaTY.1		mpAcaTY_178	IS481	140398	Plus2	304	100	44	0	1.8e-25
		290	ATCC 51756	Megaplasmid mpAcaTY.1		mpAcaTY_181´	IS3_IS51_combined	142648	Plus2	402	100	69	3	2.5e-170
		300	ATCC 51756	Megaplasmid mpAcaTY.1		mpAcaTY_186	IS1595	147355	Plus2	54	18.1	7	0	5.8e-11
		301	ATCC 51756	Megaplasmid mpAcaTY.1		mpAcaTY_187	IS1595	147571	Plus2	78	29.08	22	2	4.3e-10
		302	ATCC 51756	Megaplasmid mpAcaTY.1		mpAcaTY_201	ISL3	160285	Plus2	397	100	62	1	5.8e-18
		303	ATCC 51756	Megaplasmid mpAcaTY.1		mpAcaTY_202	ISL3	163673	Plus3	401	100	68	84	1.8e-120
		307	ATCC 51756	Plasmid pAcaTY.1		AcaTY_1p16	IS5_IS5	16850	Plus2	422	100	103	1	1.9e-128
		309	ATCC 51756	Plasmid pAcaTY.1		AcaTY_1p17	IS1182	17992	Minus3	459	100	134	1	2.7e-83
		310	SM-1	Chromosome			ISL3	39354	Minus3	28	6.21	0	1	2e-07
		311	SM-1	Chromosome		Atc_0038	IS21_ORF2	39527	Minus1	258	100	4	1	8.9e-102
		312	SM-1	Chromosome		Atc_0039	IS21_ORF1	40312	Minus2	525	100	20	0	8.4e-193
		313	SM-1	Chromosome		Atc_0040	ISL3	42020	Minus1	451	100	57	1	2.8e-132
		314	SM-1	Chromosome		Atc_0091	IS630	97173	Minus3	365	100	24	0	9e-65
		315	SM-1	Chromosome	ICEAcaSM.1	Atc_0107	IS5_IS5	115474	Minus2	422	100	103	1	1e-127
		316	SM-1	Chromosome	ICEAcaSM.1		IS30	116514	Plus3	32	9.07	1	0	1.2e-10
		317	SM-1	Chromosome	ICEAcaSM.1		IS30	116610	Plus3	38	10.76	0	2	5.8e-10
		319	SM-1	Chromosome	ICEAcaSM.1	Atc_0128	IS5_IS5	133299	Plus3	422	100	88	1	1.1e-87
		320	SM-1	Chromosome	ICEAcaSM.1		ISL3	134645	Plus2	35	7.76	0	1	2e-09
		321	SM-1	Chromosome	ICEAcaSM.1	Atc_0131	IS5_IS5	136300	Minus2	387	91.71	117	0	9.1e-107
		322	SM-1	Chromosome	ICEAcaSM.1	Atc_0133	IS110	138520	Minus2	416	100	46	0	4.9e-65
		323	SM-1	Chromosome	ICEAcaSM.1	Atc_0134	IS110	140233	Minus2	416	100	81	3	7.3e-20
		324	SM-1	Chromosome	ICEAcaSM.1	Atc_0147	IS5_IS5	151958	Plus2	422	100	103	1	1e-127
		325	SM-1	Chromosome	ICEAcaSM.1	Atc_0154	IS5_IS5	158063	Plus2	422	100	86	1	1.2e-11
		326	SM-1	Chromosome	ICEAcaSM.1	Atc_0171	IS1182	174610	Minus2	459	100	126	1	1.3e-85
		327	SM-1	Chromosome	ICEAcaSM.1	Atc_0172	IS1182	175924	Plus1	459	100	41	2	1.5e-158
		328	SM-1	Chromosome	ICEAcaSM.1		ISL3	177674	Minus1	42	9.31	0	1	8.6e-13
		329	SM-1	Chromosome	ICEAcaSM.1	Atc_0173	ISL3	177808	Minus2	451	100	51	1	3.7e-147
		330	SM-1	Chromosome	ICEAcaSM.1	Atc_0175	IS5_IS5	180452	Minus1	225	53.32	65	1	4.1e-40
		331	SM-1	Chromosome	ICEAcaSM.1	Atc_0176	IS1595	180962	Minus1	337	100	58	0	1.5e-117
		332	SM-1	Chromosome	ICEAcaSM.1	Atc_0177	IS5_IS5	181911	Minus3	199	47.16	38	0	2.6e-78
		333	SM-1	Chromosome	ICEAcaSM.1	Atc_0181	IS5_IS5	183865	Minus2	422	100	85	1	1.3e-87
		334	SM-1	Chromosome	ICEAcaSM.1	Atc_0190	ISL3	193204	Plus1	451	100	51	1	3.7e-147
		335	SM-1	Chromosome	ICEAcaSM.1		IS256	197801	Plus2	59	14.68	8	0	1e-15
		336	SM-1	Chromosome	ICEAcaSM.1	Atc_0203	IS21_ORF1	209890	Plus1	525	100	35	0	1.7e-132
		337	SM-1	Chromosome	ICEAcaSM.1	Atc_0204	IS21_ORF2	211425	Plus3	258	100	3	0	1e-94
		338	SM-1	Chromosome	ISR1	Atc_0211	ISL3	220225	Minus2	451	100	51	1	3.7e-147
		339	SM-1	Chromosome	ISR1		IS1182	222068	Minus1	87	18.95	15	2	5.8e-19
		340	SM-1	Chromosome	ISR1	Atc_0213	IS1182	222329	Minus1	280	61	23	0	3.6e-72
		341	SM-1	Chromosome	ISR1	Atc_0214	IS66_ORF1
		342	SM-1	Chromosome	ISR1	Atc_0215	IS66_combined	224247	Plus3	107	12.62	1	0	1.8e-32
		343	SM-1	Chromosome	ISR1	Atc_0216	IS66_ORF3	224567	Plus2	558	100	51	1	7.5e-31
		344	SM-1	Chromosome	ISR1	Atc_0217	IS66_ORF4
		345	SM-1	Chromosome	GIAcaSM.1	Atc_0425	IS5_IS5	437507	Plus2	422	100	102	1	1e-118
		346	SM-1	Chromosome	GIAcaSM.1	Atc_0437	IS3_IS3_ORF1	449111	Plus2	109	100	8	0	4.2e-21
		347	SM-1	Chromosome	GIAcaSM.1	Atc_0438	IS3_IS3_ORF1	449466	Plus3	286	100	14	1	1.5e-56
		348	SM-1	Chromosome		Atc_0493	IS1595	506641	Minus2	337	100	58	0	2.7e-113
		349	SM-1	Chromosome		Atc_0494	ISL3	507523	Minus2	451	100	51	1	3.7e-147
		350	SM-1	Chromosome	ISR2		IS3_IS51_combined	516402	Minus3	434	100	55	4	6e-200
		351	SM-1	Chromosome	ISR2	Atc_0507	ISL3	518424	Minus3	451	100	51	1	3.7e-147
		352	SM-1	Chromosome	ISR2	Atc_0510	ISL3	521097	Plus3	451	100	51	1	3.7e-147
		353	SM-1	Chromosome		Atc_0518	IS630	531336	Minus3	365	100	24	0	9e-65
		354	SM-1	Chromosome		Atc_0562	IS3_IS150_combined	573888	Plus3	42	8.33	1	1	4.3e-06
		355	SM-1	Chromosome		Atc_0681	ISL3	679368	Plus3	451	100	51	1	3.7e-147
		356	SM-1	Chromosome	GIAcaSM.2	Atc_0757	IS481	758349	Plus3	341	100	44	0	1.2e-29
		357	SM-1	Chromosome	GIAcaSM.2	Atc_0758	ISChy3, orf3????
		358	SM-1	Chromosome	GIAcaSM.2	Atc_0772	IS5_IS5	773465	Plus2	422	100	103	2	6.9e-117
		359	SM-1	Chromosome	GIAcaSM.2	Atc_0773	IS5_IS5	774856	Plus1	422	100	78	1	5.3e-12
		360	SM-1	Chromosome	GIAcaSM.2	Atc_0774c	IS110	776128	Plus1	416	100	79	0	3.7e-83
		361	SM-1	Chromosome	GIAcaSM.2	Atc_0777	ISL3	778622	Plus2	451	100	51	1	3.7e-147
		362	SM-1	Chromosome	GIAcaSM.2	Atc_0780	IS66_combined	781261	Plus1	44	5.19	0	0	3.2e-15
		363	SM-1	Chromosome	GIAcaSM.2		IS66_combined	781385	Plus2	27	3.18	0	0	1.1e-07
		364	SM-1	Chromosome	GIAcaSM.2	Atc_0783	IS1182	788096	Plus2	459	100	126	1	3.2e-84
		365	SM-1	Chromosome		Atc_0790	IS5_IS5	796000	Plus1	422	100	101	1	1.2e-119
		366	SM-1	Chromosome			IS5_IS5	895107	Plus3	50	11.85	2	0	9.7e-15
		367	SM-1	Chromosome			IS5_IS5	895431	Plus3	27	6.4	0	2	5.7e-06
		368	SM-1	Chromosome		Atc_0900	ISL3	898746	Minus3	451	100	51	1	2.9e-146
		369	SM-1	Chromosome		Atc_0901	ISL3	900138	Plus3	451	100	51	1	1.8e-120
		370	SM-1	Chromosome		Atc_0904	IS5_IS5	901899	Minus3	422	100	103	1	2.8e-126
		371	SM-1	Chromosome			IS481	977048	Minus1	67	19.65	1	0	3.7e-11
		372	SM-1	Chromosome			IS3_IS3_combined	977613	Minus3	80	18.87	9	0	5.7e-06
		373	SM-1	Chromosome		Atc_0995	ISL3	984409	Plus1	451	100	51	1	3.7e-147
		374	SM-1	Chromosome	IMEAcaSM.1	Atc_1026	IS256	1012699	Minus2	402	100	23	0	3.3e-118
		375	SM-1	Chromosome	IMEAcaSM.1	Atc_1031	ISL3	1020481	Plus1	451	100	51	1	1.8e-120
		376	SM-1	Chromosome	IMEAcaSM.1	Atc_1032	ISL3	1021788	Plus3	451	100	51	1	3.7e-147
		377	SM-1	Chromosome	IMEAcaSM.1	Atc_1037	IS5_IS5	1031407	Plus1	422	100	85	1	3.2e-12
		378	SM-1	Chromosome	IMEAcaSM.1	Atc_1049	IS1595	1045487	Plus2	337	100	58	0	1.5e-117
		379	SM-1	Chromosome	IMEAcaSM.1	Atc_1052	IS1182	1048505	Plus2	265	57.73	22	0	3.2e-80
		380	SM-1	Chromosome	IMEAcaSM.1		IS1182	1049375	Plus2	87	18.95	26	1	7e-17
		381	SM-1	Chromosome	IMEAcaSM.1	Atc_1062	IS66_ORF3	1060689	Minus3	558	100	52	1	2.5e-34
		382	SM-1	Chromosome	IMEAcaSM.1	Atc_1063	IS66_combined	1062284	Minus1	107	12.62	1	0	1.8e-32
		383	SM-1	Chromosome	IMEAcaSM.1	Atc_1065	IS21_ORF2	1063168	Minus2	258	100	3	0	1e-94
		384	SM-1	Chromosome	IMEAcaSM.1	Atc_1066	IS21_ORF1	1063944	Minus3	525	100	35	0	1.7e-132
		385	SM-1	Chromosome	IMEAcaSM.1	Atc_1074	ISL3	1072694	Minus1	451	100	51	1	3.7e-147
		386	SM-1	Chromosome	IMEAcaSM.1	Atc_1085	IS256	1084241	Plus2	349	86.82	14	0	2.8e-119
		387	SM-1	Chromosome	IMEAcaSM.1		IS5_IS5	1085474	Minus1	35	8.29	0	1	1e-11
		388	SM-1	Chromosome	IMEAcaSM.1		IS1_ORF1	1087016	Minus1	89	100	1	0	1e-05
		389	SM-1	Chromosome	ICEAcaSM.2	Atc_1100	IS5_IS5	1101134	Minus1	422	100	88	1	7.3e-93
		390	SM-1	Chromosome	ICEAcaSM.2	Atc_1103
		391	SM-1	Chromosome	ICEAcaSM.2	Atc_1104	IS481	1104782	Minus1	341	100	44	0	1.3e-28
		392	SM-1	Chromosome	ICEAcaSM.2	Atc_1105
		393	SM-1	Chromosome	ICEAcaSM.2	Atc_1112	ISL3	1112601	Plus3	451	100	51	1	3.7e-147
		394	SM-1	Chromosome	ICEAcaSM.2	Atc_1131	IS5_IS5	1136508	Plus3	422	100	103	1	1.8e-128
		395	SM-1	Chromosome	ICEAcaSM.2	Atc_1138	ISL3	1144599	Plus3	451	100	51	1	1.8e-120
		396	SM-1	Chromosome	ICEAcaSM.2	Atc_1140	IS21_ORF1	1147172	Plus2	525	100	35	0	1.7e-132
		397	SM-1	Chromosome	ICEAcaSM.2	Atc_1141	IS21_ORF2	1148707	Plus1	258	100	3	0	1e-94
		398	SM-1	Chromosome		Atc_1195	ISChy9, transposase orfB
		399	SM-1	Chromosome		Atc_1252	ISChy9, transposase orfB
		400	SM-1	Chromosome		Atc_1254	IS110	1268352	Minus3	81	19.47	14	0	2.3e-13
		401	SM-1	Chromosome		Atc_1295	ISChy9, transposase orfB
		402	SM-1	Chromosome		Atc_1343	IS1182	1368282	Minus3	459	100	134	1	3.8e-84
		403	SM-1	Chromosome		Atc_1379	IS5_IS5	1409878	Plus1	422	100	85	1	5.1e-88
		404	SM-1	Chromosome		Atc_1436	ISL3	1473591	Minus3	451	100	51	1	3.7e-147
		405	SM-1	Chromosome		Atc_1473	ISL3	1508341	Plus1	451	100	51	1	3.7e-147
		406	SM-1	Chromosome		Atc_1527	ISL3	1568727	Plus3	451	100	51	1	1.8e-120
		407	SM-1	Chromosome		Atc_1553	ISL3	1595006	Minus1	451	100	51	1	3.7e-147
		408	SM-1	Chromosome		Atc_1563	ISL3	1605340	Plus1	451	100	51	1	3.7e-147
		409	SM-1	Chromosome		Atc_1565	IS21_ORF2	1607696	Minus1	258	100	3	0	1e-94
		410	SM-1	Chromosome		Atc_1566	IS21_ORF1	1608472	Minus2	525	100	35	0	6.7e-132
		411	SM-1	Chromosome		Atc_1567	IS5_IS5	1610815	Plus1	422	100	134	7	2.1e-13
		412	SM-1	Chromosome		Atc_1568	IS5_IS5	1610931	Plus3	422	100	139	2	3.3e-35
		413	SM-1	Chromosome		Atc_1569	IS5_IS5	1611953	Plus2	422	100	103	1	1.6e-129
		414	SM-1	Chromosome		Atc_1570	ISL3	1613044	Plus1	451	100	51	1	1.8e-120
		415	SM-1	Chromosome		Atc_1571	IS21_combined	1614531	Plus3	125	14.85	19	0	5e-13
		416	SM-1	Chromosome		Atc_1572	IS21_ORF1	1614548	Plus2	525	100	45	4	2.3e-68
		417	SM-1	Chromosome		Atc_1547	IS66_combined	1616439	Plus3	107	12.62	1	0	1.8e-32
		418	SM-1	Chromosome		Atc_1575	IS66_ORF3	1616759	Plus2	558	100	52	1	4.7e-34
		419	SM-1	Chromosome		Atc_1577	IS21_ORF2	1618700	Plus2	258	100	7	2	9.1e-89
		420	SM-1	Chromosome		Atc_1578	IS5_IS5	1619480	Minus1	41	9.72	0	0	1.9e-13
		421	SM-1	Chromosome		Atc_1579	IS3_IS51_ORF1	1619797	Plus1	108	100	32	2	2.3e-12
		422	SM-1	Chromosome		Atc_1589	IS5_IS5	1629775	Plus1	422	100	87	1	1.2e-88
		423	SM-1	Chromosome			IS256	1638211	Plus1	111	27.61	2	0	7.3e-19
		424	SM-1	Chromosome			IS256	1638581	Plus2	81	20.15	1	0	7.8e-31
		425	SM-1	Chromosome		Atc_1597	IS630	1643798	Minus1	365	100	24	0	9e-65
		426	SM-1	Chromosome		Atc_1600	IS5_IS5	1646400	Minus3	422	100	103	1	2.8e-126
		427	SM-1	Chromosome		Atc_1617
		428	SM-1	Chromosome		Atc_1618	IS66_combined	1661456	Plus2	107	12.62	1	0	1.8e-32
		429	SM-1	Chromosome		Atc_1619	IS66_ORF3	1661776	Plus1	558	100	52	1	8.3e-34
		430	SM-1	Chromosome		CDS
		431	SM-1	Chromosome		Atc_1622	IS3_IS150_combined	1664880	Minus3	48	9.52	7	0	7.5e-06
		432	SM-1	Chromosome		Atc_1623	IS3_IS3_ORF2	1665011	Minus1	229	79.51	14	0	1.9e-41
		433	SM-1	Chromosome		Atc_1628	IS1595	1668604	Minus2	337	100	47	10	8.7e-117
		434	SM-1	Chromosome		Atc_1629	IS5_IS5	1670771	Minus1	389	92.18	102	1	1.6e-104
		435	SM-1	Chromosome		Atc_1631	IS66_ORF3	1672024	Minus2	558	100	52	1	4.7e-34
		436	SM-1	Chromosome		Atc_1632	IS66_combined	1673619	Minus3	107	12.62	1	0	1.8e-32
		437	SM-1	Chromosome		Atc_1660	IS110	1706910	Plus3	416	100	80	0	5.3e-95
		438	SM-1	Chromosome	ISR5	Atc_1793	IS481	1854362	Minus1	341	100	46	0	4.3e-12
		439	SM-1	Chromosome	ISR5	Atc_1798	ISL3	1858836	Plus3	451	100	51	1	4e-124
		440	SM-1	Chromosome	ISR5	Atc_1800
		441	SM-1	Chromosome	ISR5	Atc_1801	IS66_ORF3	1861827	Minus3	558	100	51	1	7.5e-31
		442	SM-1	Chromosome	ISR5	Atc_1802	IS66_combined	1863422	Minus1	107	12.62	1	0	1.8e-32
		443	SM-1	Chromosome	ISR5	Atc_1803
		444	SM-1	Chromosome	ISR5	Atc_1813	ISL3	1870366	Minus2	451	100	60	1	1.9e-127
		445	SM-1	Chromosome	ISR5	Atc_1814	IS21_ORF2	1871550	Minus3	258	100	3	0	1e-94
		446	SM-1	Chromosome	ISR5	Atc_1815	IS21_ORF1	1872326	Minus1	525	100	35	0	1.7e-132
		447	SM-1	Chromosome	ISR5	Atc_1817	IS5_IS5	1874529	Plus3	422	100	85	1	4.8e-12
		448	SM-1	Chromosome	GIAcaSM.5	Atc_1834	IS630	1893861	Plus3	365	100	24	0	2.1e-64
		449	SM-1	Chromosome	GIAcaSM.5	Atc_1842	ISL3	1900227	Minus3	451	100	51	1	3.7e-147
		450	SM-1	Chromosome		Atc_1847	IS1182	1905084	Minus3	87	18.95	37	0	1.4e-15
		451	SM-1	Chromosome		Atc_1851	ISL3	1908840	Plus3	451	100	51	1	3.1e-121
		452	SM-1	Chromosome		Atc_1917_1918	IS256	1961679	Minus3	380	94.53	17	1	8.7e-114
		453	SM-1	Chromosome		Atc_1919	IS110	1963193	Minus1	416	100	80	2	2.3e-92
		454	SM-1	Chromosome		Atc_1931	ISL3	1971522	Plus3	451	100	51	1	3.7e-147
		455	SM-1	Chromosome		Atc_1943	IS21_ORF1	1985819	Plus2	525	100	35	0	1.7e-132
		456	SM-1	Chromosome			IS21_ORF2	1987354	Plus1	40	15.5	1	0	2e-12
		457	SM-1	Chromosome		Atc_1944	ISL3	1987479	Minus3	451	100	51	1	3.7e-147
		458	SM-1	Chromosome		Atc_1945	IS21_ORF2	1988661	Plus3	258	100	3	1	2.2e-72
		459	SM-1	Chromosome		Atc_1949 US	IS5_IS5	1994104	Minus2	176	41.71	64	0	1.3e-09
		460	SM-1	Chromosome		Atc_1949	IS5_IS5	1994423	Minus1	166	39.34	5	0	1e-44
		461	SM-1	Chromosome		Atc_1952	IS3_IS3_ORF2	1996189	Plus1	288	100	13	5	2.5e-13
		462	SM-1	Chromosome		Atc_1979	IS3_IS3_combined	2023897	Plus1	80	18.87	9	0	5.7e-06
		463	SM-1	Chromosome		Atc_1979	IS481	2024513	Plus2	67	19.65	1	0	3.7e-11
		464	SM-1	Chromosome	ICEAcaSM.4	Atc_2006	ISL3	2049924	Plus3	451	100	51	1	3.7e-147
		465	SM-1	Chromosome	ICEAcaSM.4	Atc_2014	IS21_ORF2	2058999	Minus3	109	42.25	0	0	8.1e-20
		466	SM-1	Chromosome	ICEAcaSM.4	Atc_2030	ISL3	2079004	Minus2	451	100	51	1	3.7e-147
		467	SM-1	Chromosome	ICEAcaSM.4	Atc_2033	ISL3	2081948	Plus2	451	100	51	1	3.7e-147
		468	SM-1	Chromosome	ICEAcaSM.4	Atc_2055	ISL3	2105635	Minus2	451	100	51	1	3.7e-147
		469	SM-1	Chromosome	ICEAcaSM.4	Atc_2064	ISL3	2112433	Minus2	451	100	51	1	3.7e-147
		470	SM-1	Chromosome	ICEAcaSM.4	Atc_2074	IS110	2119773	Minus3	416	100	46	0	1.8e-71
		471	SM-1	Chromosome	ICEAcaSM.4		IS630	2121613	Minus2	61	16.71	15	0	1.1e-06
		472	SM-1	Chromosome	ICEAcaSM.4	Atc_2081	IS256	2127780	Plus3	402	100	23	1	6.3e-111
		473	SM-1	Chromosome	ICEAcaSM.4	Atc_2085	IS21_ORF2	2131464	Minus3	258	100	3	0	1e-94
		474	SM-1	Chromosome	ICEAcaSM.4	Atc_2086	IS21_ORF1	2132240	Minus1	525	100	35	0	1.7e-132
		475	SM-1	Chromosome	ICEAcaSM.4	Atc_2100	ISL3	2142183	Plus3	451	100	51	1	3.7e-147
		476	SM-1	Chromosome	ICEAcaSM.4	Atc_2101	ISL3	2143407	Minus3	451	100	51	1	4e-124
		477	SM-1	Chromosome	ICEAcaSM.4	Atc_2104	IS21_ORF1	2147703	Plus3	525	100	20	0	2.1e-193
		478	SM-1	Chromosome	ICEAcaSM.4	Atc_2105	IS21_ORF2	2149241	Plus2	258	100	4	1	3.4e-101
		479	SM-1	Chromosome	ICEAcaSM.4	Atc_2113	ISL3	2158000	Minus2	451	100	51	1	3.7e-147
		480	SM-1	Chromosome	ICEAcaSM.4	Atc_2134	ISL3	2177854	Plus1	451	100	51	1	3.7e-147
		481	SM-1	Chromosome		Atc_2223	IS21_ORF2	2280014	Minus1	258	100	3	0	1e-94
		482	SM-1	Chromosome		Atc_2224	IS21_ORF1	2280790	Minus2	525	100	35	0	6.7e-132
		483	SM-1	Chromosome		Atc_2258	IS66_ORF3	2319038	Plus2	50	8.96	0	0	3.6e-09
		484	SM-1	Chromosome		Atc_2411	IS5_IS5	2465133	Plus3	422	100	103	1	5.3e-127
		485	SM-1	Chromosome		Atc_2728	ISL3	2787027	Plus3	451	100	51	1	1.8e-120
		486	SM-1	Chromosome		Atc_2735	IS1182	2792972	Minus1	459	100	126	1	4e-87
		487	SM-1	Megaplasmid mpLAtc		Atc_m008	IS5_IS5	7265	Plus2	80	18.96	0	0	8.8e-22
		488	SM-1	Megaplasmid mpLAtc		Atc_m010	IS5_IS5	9219	Plus3	195	46.21	63	1	2.1e-32
		489	SM-1	Megaplasmid mpLAtc		Atc_m011	IS630	9639	Minus3	365	100	59	15	9e-10
		490	SM-1	Megaplasmid mpLAtc		Atc_m012	IS5_IS5	10262	Plus2	422	100	106	3	7.8e-29
		491	SM-1	Megaplasmid mpLAtc		Atc_m013	IS21_ORF2	10909	Minus2	258	100	4	1	2.6e-103
		492	SM-1	Megaplasmid mpLAtc		Atc_m014	IS21_ORF1	11685	Minus3	525	100	22	0	7.5e-174
		493	SM-1	Megaplasmid mpLAtc		Atc_m015	IS5_IS5	13379	Plus2	208	49.29	66	0	1.8e-27
		494	SM-1	Megaplasmid mpLAtc		Atc_m016	IS630	13635	Minus3	365	100	85	2	6.2e-11
		495	SM-1	Megaplasmid mpLAtc		Atc_m017	IS66_ORF3	14441	Plus2	558	100	169	4	1.2e-17
		496	SM-1	Megaplasmid mpLAtc		Atc_m019	IS1182	18343	Plus1	265	57.73	23	0	4e-22
		497	SM-1	Megaplasmid mpLAtc		Atc_m0131	IS5_IS5	31243	Plus1	422	100	88	1	4.4e-94
		498	SM-1	Megaplasmid mpLAtc			IS3_IS3_ORF2	32489	Minus1	45	15.62	0	0	2e-15
		499	SM-1	Megaplasmid mpLAtc		Atc_m045	IS630	39840	Minus3	365	100	24	0	3.4e-63
		500	SM-1	Megaplasmid mpLAtc		Atc_m060	IS91	57812	Minus1	528	100	111	2	3.1e-11
		501	SM-1	Megaplasmid mpLAtc		Atc_m062	IS630	58889	Minus1	365	100	54	5	3.3e-08
		502	SM-1	Megaplasmid mpLAtc			IS1595	69579	Minus3	24	7.12	0	0	4.9e-08
		503	SM-1	Megaplasmid mpLAtc		Atc_m071	ISL3	71539	Minus2	451	100	51	1	3.7e-147
		504	SM-1	Megaplasmid mpLAtc		Atc_m085	ISL3	86927	Plus2	451	100	51	1	3.7e-147
		505	SM-1	Megaplasmid mpLAtc		Atc_m097	Tn7 transposon
		506	SM-1	Megaplasmid mpLAtc		Atc_m098	Tn7 transposon
		507	SM-1	Megaplasmid mpLAtc		Atc_m099	Tn7 transposon
		508	SM-1	Megaplasmid mpLAtc		Atc_m100	Tn7 transposon
		509	SM-1	Megaplasmid mpLAtc		Atc_m101	Tn7 transposon
		510	SM-1	Megaplasmid mpLAtc		Atc_m102	ISL3	109297	Plus1	451	100	51	1	3.7e-147
		511	SM-1	Megaplasmid mpLAtc		Atc_m014	IS21_ORF2	111455	Minus1	258	100	4	1	2.6e-103
		512	SM-1	Megaplasmid mpLAtc		Atc_m105	IS21_ORF1	112231	Minus2	525	100	22	0	7.5e-174
		513	SM-1	Megaplasmid mpLAtc		Atc_m160	ISChy9, transposase orfB
		514	SM-1	Megaplasmid mpLAtc		Atc_m163	IS21_ORF2	160805	Minus1	258	100	3	0	1e-94
		515	SM-1	Megaplasmid mpLAtc		Atc_m0164	IS21_ORF1	161581	Minus2	525	100	35	0	1.7e-132
		516	SM-1	Megaplasmid mpLAtc		Atc_m175_176	IS66_ORF2	174953	Plus2	465	100	77	6	2.6e-09
		517	SM-1	Megaplasmid mpLAtc		Atc_m177	IS66_combined	176343	Plus3	166	19.58	8	0	7.8e-31
		518	SM-1	Megaplasmid mpLAtc		Atc_m178	IS110	177113	Minus1	416	100	80	0	5.3e-95
		519	SM-1	Megaplasmid mpLAtc			IS66_ORF3	178265	Plus2	132	23.66	0	0	1e-46
		520	SM-1	Megaplasmid mpLAtc			IS66_combined	178681	Plus1	55	6.49	5	1	3.9e-25
		521	SM-1	Megaplasmid mpLAtc		Atc_m181	IS21_ORF2	179664	Minus3	258	100	4	0	5.1e-110
		522	SM-1	Megaplasmid mpLAtc		Atc_m182	IS21_combined	180434	Minus1	460	54.63	93	0	4.7e-83
		523	SM-1	Megaplasmid mpLAtc		Atc_m184_185	IS66_ORF3	182374	Plus1	558	100	168	3	2.3e-15
		524	SM-1	Megaplasmid mpLAtc		Atc_m190	ISL3	187781	Minus1	451	100	51	1	3.7e-147
		525	SM-1	Megaplasmid mpLAtc		Atc_m197	ISL3	193074	Plus3	451	100	112	1	1.1e-29
		526	SM-1	Megaplasmid mpLAtc		Atc_m199	IS5_IS5	195713	Plus2	422	100	85	1	4.6e-86
		527	SM-1	Megaplasmid mpLAtc		Atc_m200	IS21_ORF2	197128	Minus2	258	100	4	1	2.6e-103
		528	SM-1	Megaplasmid mpLAtc		Atc_m201	IS21_ORF1	197904	Minus3	525	100	22	0	8e-174
		529	SM-1	Megaplasmid mpLAtc		Atc_m202	IS5_IS5	200082	Plus3	422	100	88	1	7.3e-93
		530	SM-1	Megaplasmid mpLAtc		Atc_m205	IS66_ORF3	201971	Minus1	558	100	53	1	3.1e-31
		531	SM-1	Megaplasmid mpLAtc		Atc_m206	IS66_combined	203566	Minus2	107	12.62	2	0	5e-34
		532	SM-1	Megaplasmid mpLAtc		Atc_m209	ISL3	205538	Plus2	451	100	51	1	3.7e-147
		533	SM-1	Megaplasmid mpLAtc		Atc_m211	IS256	208945	Plus1	402	100	21	0	6.7e-119
		534	SM-1	Megaplasmid mpLAtc		Atc_m212	ISL3	210613	Plus1	451	100	51	1	3.1e-121
		535	SM-1	Megaplasmid mpLAtc		Atc_m216	IS5_IS5	215921	Plus2	422	100	98	3	5.6e-37
		536	SM-1	Megaplasmid mpLAtc		Atc_m217	IS21_ORF2	216653	Minus1	258	100	4	1	7.5e-103
		537	SM-1	Megaplasmid mpLAtc		Atc_m218	IS21_ORF1	217429	Minus2	525	100	22	0	1.4e-174
		538	SM-1	Megaplasmid mpLAtc		Atc_m219	IS5_IS5	219116	Plus2	140	33.18	21	0	2.5e-21
		539	SM-1	Megaplasmid mpLAtc		Atc_m220	IS256	219820	Minus2	402	100	21	0	7.9e-118
		540	SM-1	Megaplasmid mpLAtc		Atc_m222-223	IS3_IS150_combined	221999	Plus2	504	100	89	7	5.7e-22
		541	SM-1	Megaplasmid mpLAtc			ISL3	224700	Minus3	35	7.76	0	1	2e-09
		542	SM-1	Megaplasmid mpLAtc		Atc_m226	IS5_IS5	225176	Minus1	393	93.13	85	0	1.9e-88
		543	SM-1	Megaplasmid mpLAtc		Atc_m234	IS5_IS5	231565	Plus1	422	100	88	1	7.3e-93
		544	SM-1	Megaplasmid mpLAtc		Atc_m249	IS66_combined	245110	Plus1	166	19.58	8	0	7.8e-31
		545	SM-1	Megaplasmid mpLAtc		Atc_m250	IS110	245880	Minus3	416	100	80	0	5.3e-95
		546	SM-1	Megaplasmid mpLAtc		Atc_m251_252	IS66_ORF3	246851	Plus2	558	100	144	5	4.1e-27
		547	SM-1	Megaplasmid mpLAtc		Atc_m253	IS256	248797	Minus2	182	45.27	16	0	8.9e-27
		548	SM-1	Megaplasmid mpLAtc		Atc_m255	IS1380	250391	Plus2	487	100	54	0	1.1e-08
		549	SM-1	Plasmid pLAtc1		Atc_1p04	IS200_IS605	4529	Minus1	153	100	3	1	6.3e-30
		550	SM-1	Plasmid pLAtc2		Atc_2p09	IS481	10593	Plus3	39	11.44	0	0	1.2e-06
		551	SM-1	Plasmid pLAtc3		Atc_3p18	ISL3	20347	Minus2	451	100	51	1	3.7e-147
		552	SM-1	Plasmid pLAtc3		Atc_3p27	IS21_ORF1	27751	Plus1	33	6.29	0	0	3.4e-06

## Sheet: 4B
	Table S4B - Features found in IS-rich regions present in the genome of A.caldus ATCC 51756 and A. caldus SM-1
			A. caldus ATCC 51756							A. caldus SM-1
		IS-rich regions	Location	Size (bp)	# ORF	# Hypoteticals	Other function	Tnp Family		Location	Size (bp)	# ORF	# Hypoteticals	Other function	Tnp Family
		ISR1	240391..254161	13770	10		O-antigen biosynthesis	ISL3 (2 )		216690..236940	20250	16			ISL3 (2)
								IS66 (1)							ISAtc_1-like Tnp
															ISS6 (Orfs 1-4)
		ISR2	531489..539487	7998	9	5	glycosyltransferase	IS 1595 (1)		516349..529339	12990	17	4	glycosyltransferase	ISL3 (2)
							bacteriocin resistance protein							bacteriocin resistance protein	IS3_IS51 (fragment)
		ISR3	564315…581232	16917	15	6	glycosyltransferase	IS1128 (1)
							pilZ	IS66 (1)
							sensory box gene	IS256 (1)
		ISR4	638623..660414	21791	15		Integrase (4 )	IS1128 (1)
							Yee type RM system	IS66 (1)
								IS256 (1)
								ISL3 (Fragments)
		ISR5								1854217..1880276	26059	27	12	Integrase (2 ORFs)	IS1128 (1)
										26059				GCN5	IS66 (1)
														ahpD-marR	IS21 (1)
														arsR	ISL3 (1)
															IS481 (1)
															ISL3 (fragments)
		ISR6	2068940..2086912	17972	15		Malic acid transporter	IS5_IS5 (2)
							TolC_RND	IS256 (1)
							LysR Regulators (2 ORFs)	IS21 (1)
								IS1182 (fragments)
